# Supplementary material
Source: Springer Nature journal article supplement (https://www.springermedizin.de/resource/supplementary/12958_2013_1162_MOESM4_ESM.pdf/9566678)

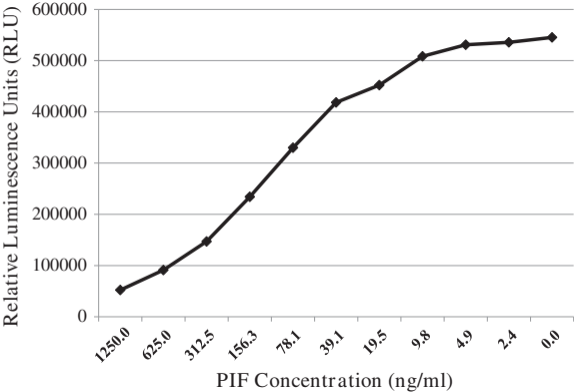

Supplement: MOESM4 [file 9566678]
